# Supplementary material for: Gold nanoparticle decorated titania for sustainable environmental remediation: green synthesis, enhanced surface adsorption and synergistic photocatalysis
Source: Royal Society of Chemistry journal article supplement (doi:10.1039/d0ra05607c), 2020-01-01
Supplement: d0ra05607c1.pdf [file d0ra05607c1.pdf]

## Electronic supplementary information

### Gold Nanoparticle Decorated Titania for Sustainable Environmental Remediation: Green Synthesis, Enhanced Surface Adsorption and Synergistic Photocatalysis

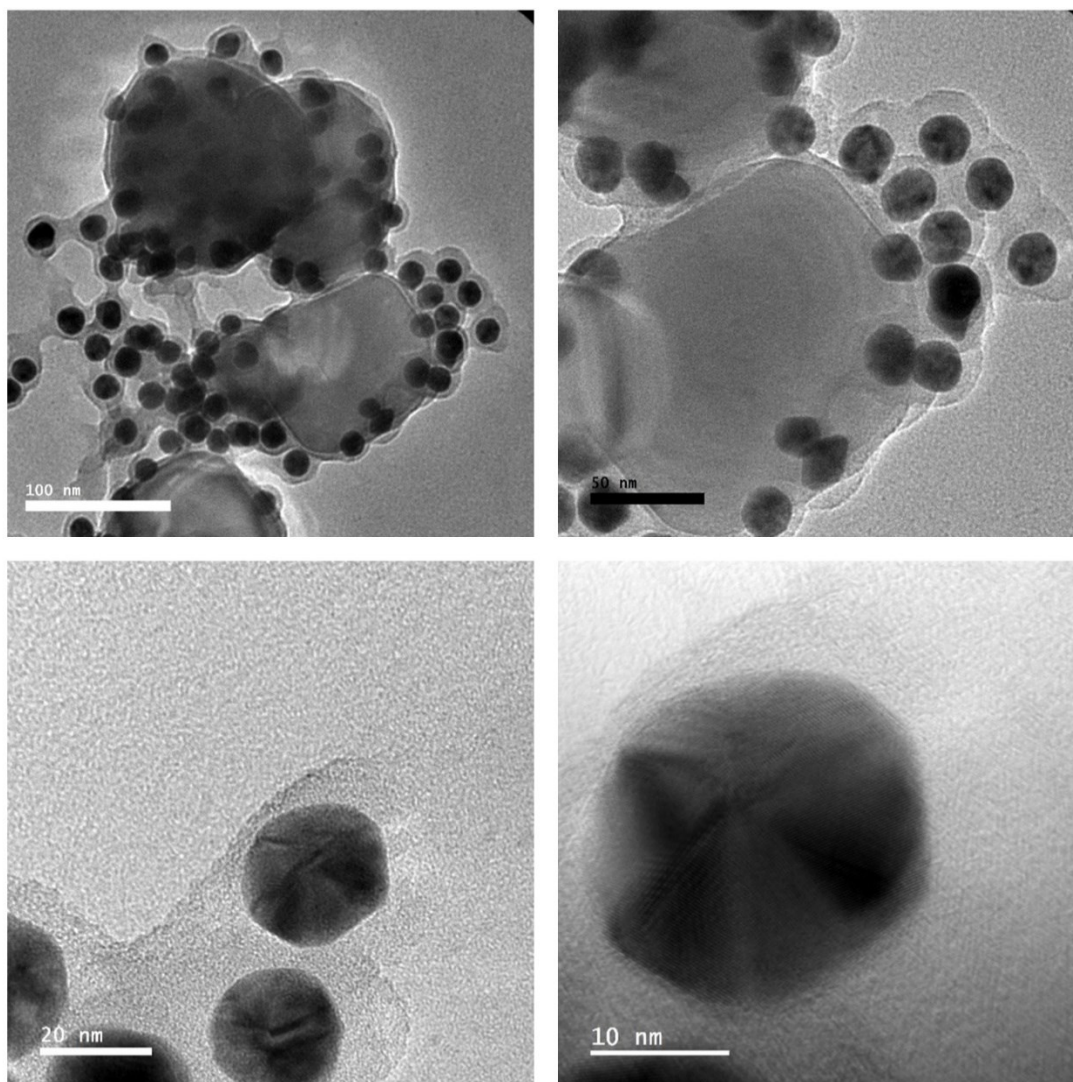

**Figure S1.** TEM images of Au/TiO<sub>2</sub> at varying levels of magnification

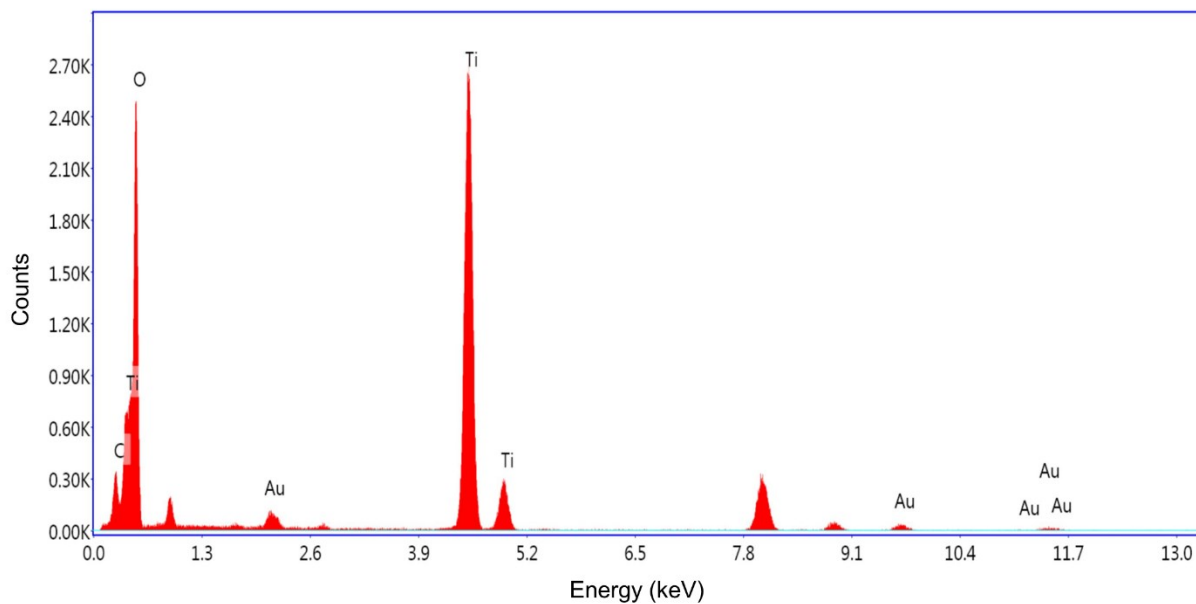

**Figure S2.** EDX spectrum for gold nanoparticles

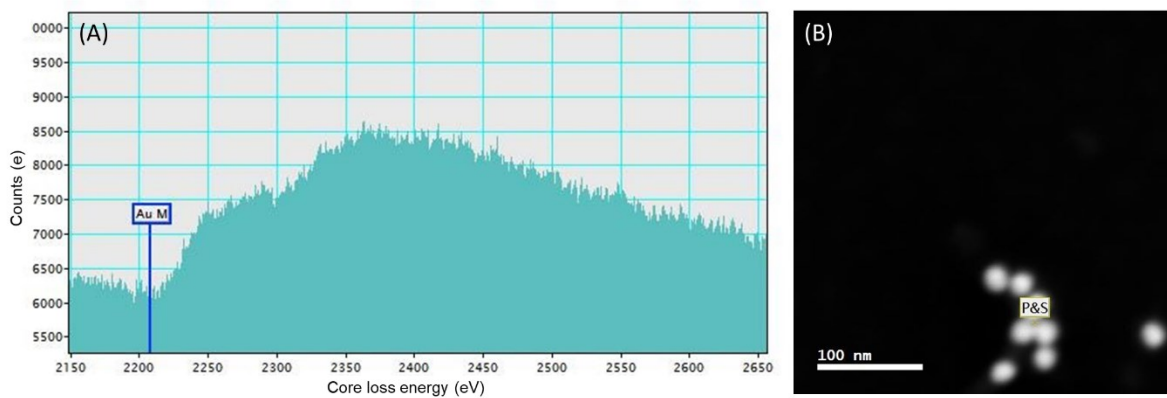

**Figure S3.** EELS spectrum with M edge of Au (a) for the position of gold nanoparticles marked as P & S in ADF image shown in (b)
